# Supplementary figures and images for: The Potential Role of Adjuvant Chemoradiotherapy in Patients with Microscopically Positive (R1) Surgical Margins after Resection of Cholangiocarcinoma
Source: MDPI journal article supplement (doi:10.3390/curroncol30050358), 2023-05-04

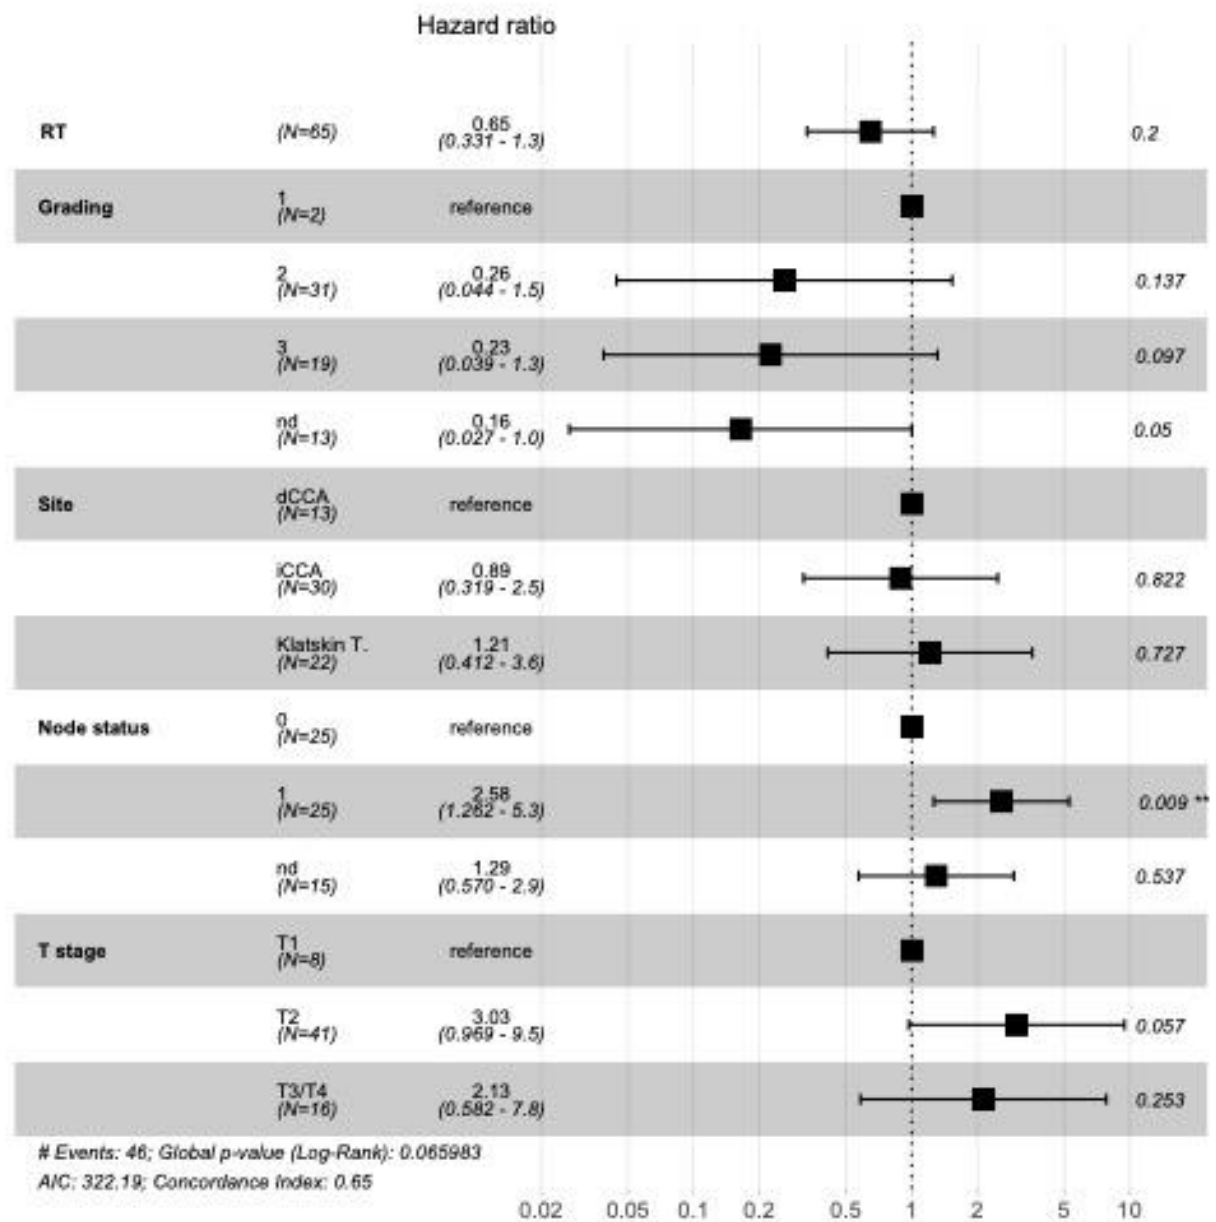

Supplementary Table S1. Multivariate analysis of recurrence-free survival for R1 patients.

Supplement: s1 [file s1]
